# Supplementary material for: Human pancreatic beta-like cells converted from fibroblasts
Source: PubMed Central journal article supplement (PMC4729817; doi:10.1038/ncomms10080), 2016-01-06
Supplement: ncomms10080-s1.pdf [file ncomms10080-s1.pdf]

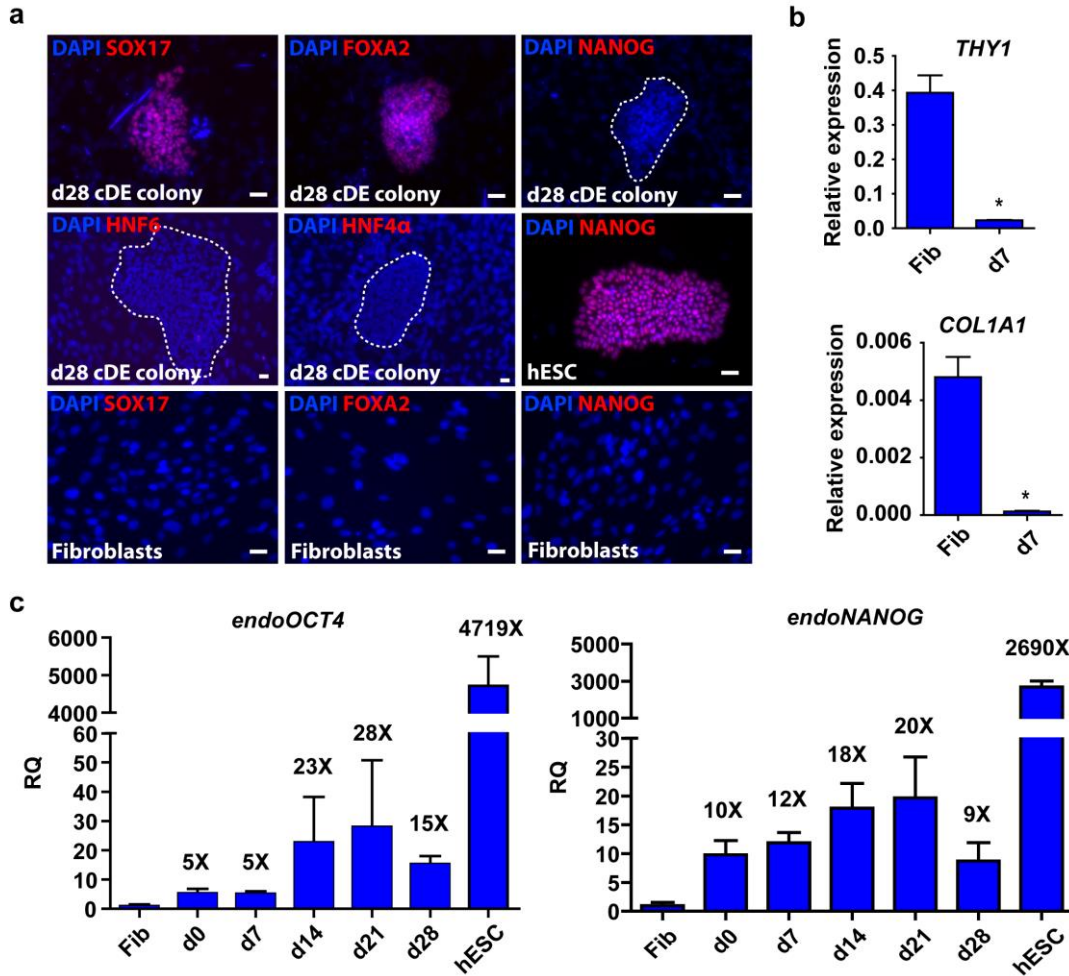

**Supplementary Figure 1. Immunofluorescence analysis of endodermal and pluripotency markers in definitive endodermal progenitors converted from fibroblasts. (a)** cDE colonies at day 28 express early endodermal progenitor markers SOX17 and FOXA2, but not primitive gut tube marker HNF4 $\alpha$ , posterior foregut marker HNF6, and pluripotency marker NANOG. Note that hESCs served as positive control for NANOG staining. Control fibroblasts do not express any marker analyzed. Scale bar, 20  $\mu$ m. **(b)** qPCR analysis revealed marked downregulation of transcript levels of two fibroblasts marker genes, *THY1* and *COL1A1*, 7 days after initiating conversion. **(c)** qPCR analyses of expression levels of endogenous pluripotent genes *OCT4* (endo*OCT4*) and *NANOG* (endo*NANOG*) during the conversion process. Note that fibroblasts (Fib) and hESCs served as negative and positive control, respectively. Mean values  $\pm$  s.e.m. are normalized to *Glyceraldehyde 3-phosphate dehydrogenase* (*GAPDH*) and relative to Fib (n=3 experiments). Fold changes relative to Fib are shown.

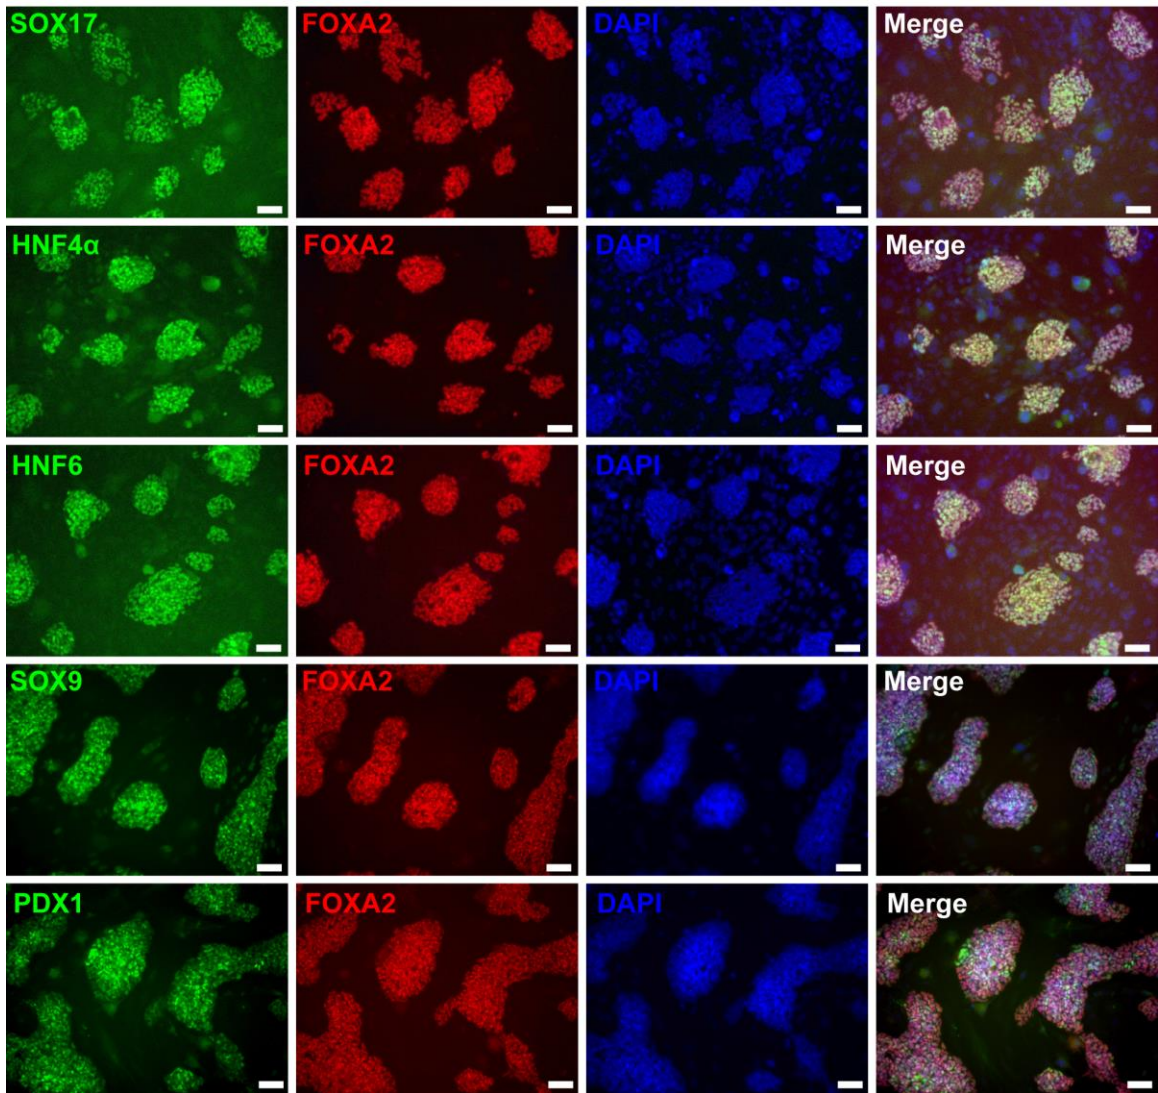

**Supplementary Figure 2. Additional characterization of cPF cells.** Single channel pictures for the immunostainings shown in Figure 2c. Scale bar, 50  $\mu$ m.

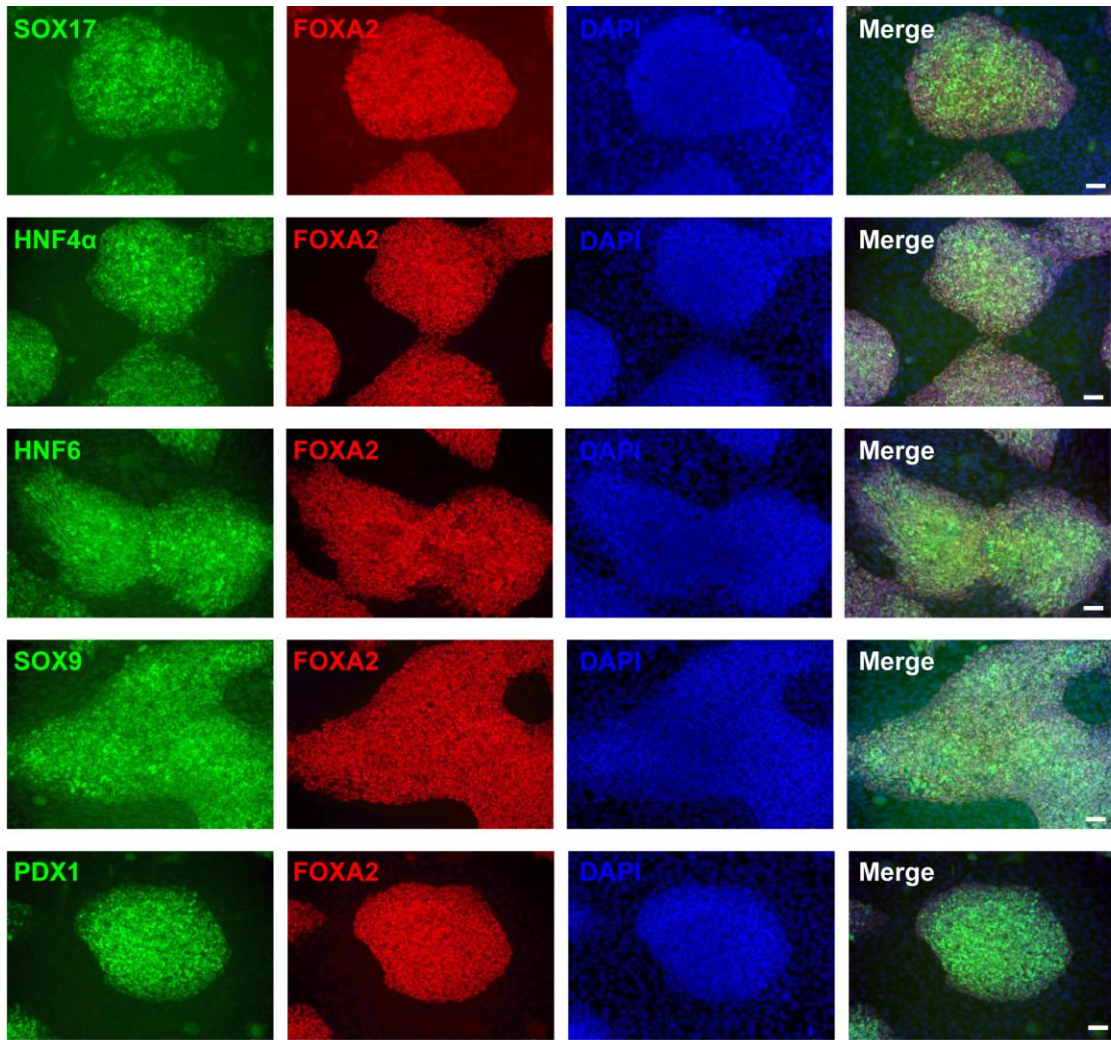

**Supplementary Figure 3. Additional characterization of cPF cells.** Single channel pictures for the immunostainings shown in Figure 2h. Scale bar, 50  $\mu$ m.



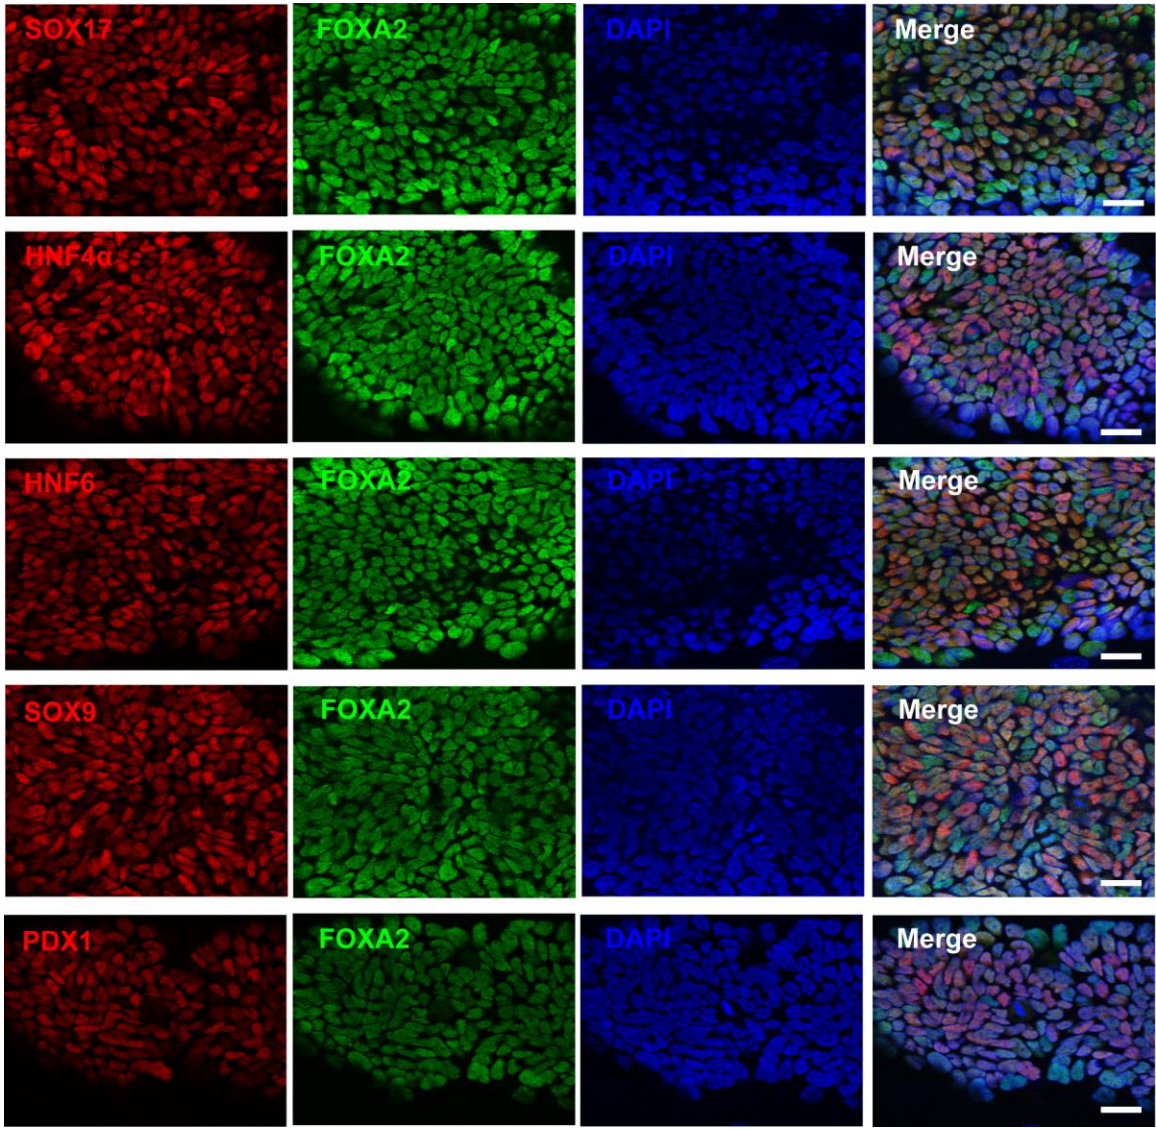

**Supplementary Figure 4. Additional characterization of cPF cells.** Higher magnification pictures for the immunostainings shown in Figure 2h. Scale bar, 20  $\mu\text{m}$ .

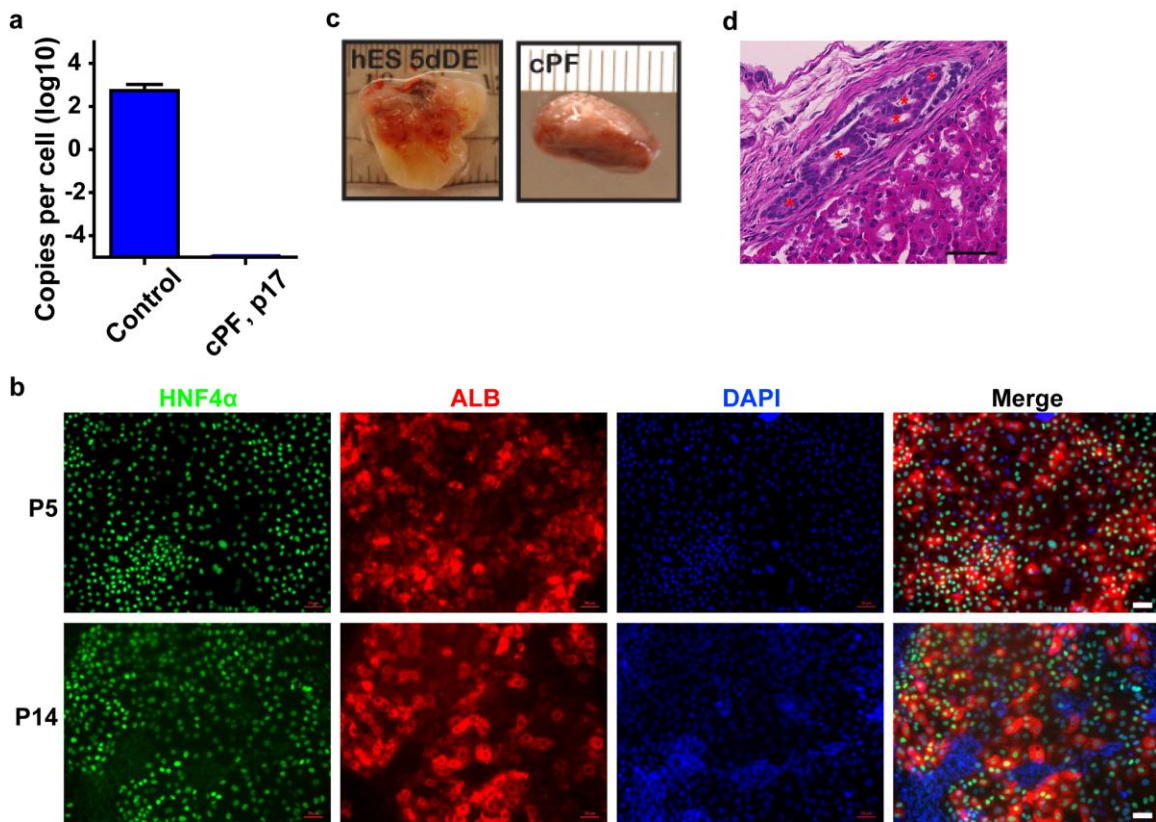

**Supplementary Figure 5. Additional characterization of cPF cells. (a)** qPCR analysis for the presence of episomal plasmid in established cPF cells at passage 17 (cPF p17). Note that episomal vectors were undetectable by this method in cPF cells. Mean values  $\pm$  s.e.m. are shown (n=3 experiments). **(b)** Immunofluorescence analysis of p5 and p14 cPF cells differentiated into hepatocytes for the transcription factor HNF4a and Albumin (ALB). Nuclei are visualized by DAPI staining. Scale bar, 50  $\mu$ m. **(c)** hESC-derived definitive endodermal cells and cPF cells were transplanted under the kidney capsule of immunodeficient mice. None of the cPF cell grafts result in tumor formation, even after prolonged periods of up to 24 weeks *in vivo* (n=10 mice), while hESC-derived endodermal cell grafts (n=4 mice) resulted in tumorigenic structures with cysts and increased graft size already after 7 weeks *in vivo*. **(d)** Representative Haematoxylin and Eosin staining of cPF graft section. Red stars indicated multiple epithelial structures. Scale bar, 50  $\mu$ m.

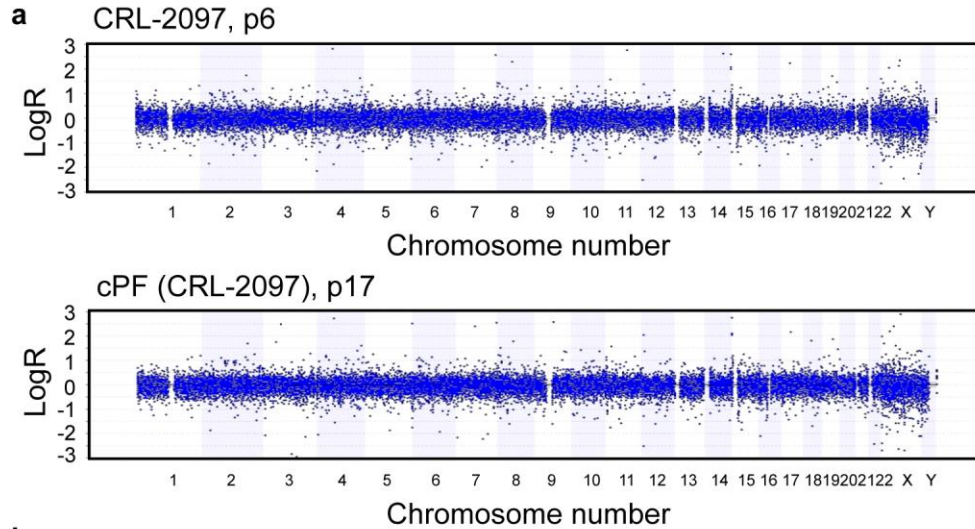

**b**

| Sample              | CNV | Location                   | Type | Annotations             |
|---------------------|-----|----------------------------|------|-------------------------|
| CRL-2097, p6        | 8   | Chr2: 89185302-89301214    | Amp  | N/A                     |
|                     |     | Chr4: 69392576-69483277    | Del  | UGT2B17, UGT2B15        |
|                     |     | Chr6: 259316-362290        | Del  | DUSP22                  |
|                     |     | Chr8: 39258894-39381514    | Del  | ADAM5P, ADAM3A          |
|                     |     | Chr12: 9637323-9693948     | Del  | N/A                     |
|                     |     | Chr14: 106405703-106803307 | Amp  | ADAM6, NCRNA00226       |
|                     |     | Chr14: 106803307-107214893 | Amp  | NCRNA00221              |
|                     |     | Chr15: 22318597-22558756   | Del  | LOC727924, OR4M2, OR4N4 |
| cPF (CRL-2097), p17 | 12  | Chr2: 89185302-89301214    | Amp  | N/A                     |
|                     |     | Chr4: 69392576-69483277    | Del  | UGT2B17, UGT2B15        |
|                     |     | Chr6: 259316-362290        | Del  | DUSP22                  |
|                     |     | Chr6: 78979161-79023328    | Del  | N/A                     |
|                     |     | Chr8: 39258894-39381514    | Del  | ADAM5P, ADAM3A          |
|                     |     | Chr11: 55385617-55450788   | Del  | OR4P4, OR4S2, OR4C6     |
|                     |     | Chr12: 9637323-9693948     | Del  | N/A                     |
|                     |     | Chr14: 19794577-20421677   | Amp  | POTEM, OR11H2, OR4Q3    |
|                     |     | Chr14: 106405703-106803307 | Amp  | ADAM6, NCRNA00226       |
|                     |     | Chr14: 106803307-107214893 | Amp  | NCRNA00221              |
|                     |     | Chr15: 22318597-22558756   | Del  | LOC727924, OR4M2, OR4N4 |
|                     |     | Chr15: 34735949-34785082   | Del  | N/A                     |

**Supplementary Figure 6. Additional characterization of cPF cells. (a+b)** Comparative genomic hybridization (CGH) array analysis of parental neonatal fibroblasts (CRL-2097) and established cPF cells at p17. **(a)** No gross chromosomal aberrations were detected in p17 cPF cells compared to parental cells. **(b)** Copy number variation analysis revealed a total of 8 and 12 CNVs in neonatal fibroblasts and expanded cPF cells, respectively. The 4 new CNVs in expanded cPF cells are highlighted in blue.



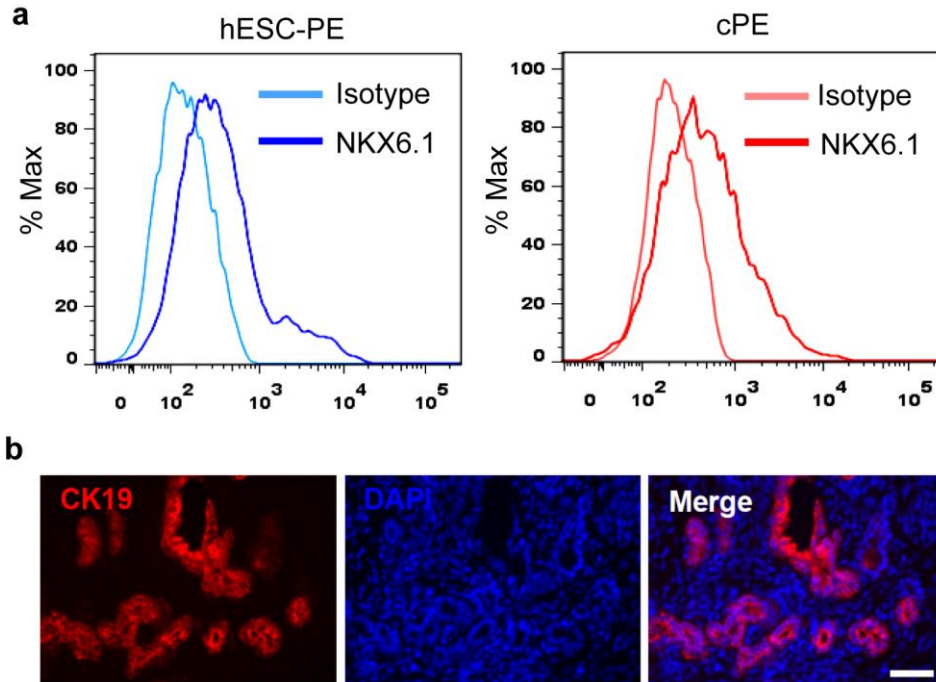

**Supplementary Figure 7. Additional characterization of cPE cells.** (a) Flow cytometric analysis of NKX6.1 protein expression in cPE cells and hESC differentiated into pancreatic cells. (b) Immunofluorescence staining for the duct marker Cytokeratin 19 (CK19) in cPE grafts. Nuclei are visualized by DAPI staining. Scale bar, 50  $\mu$ m.

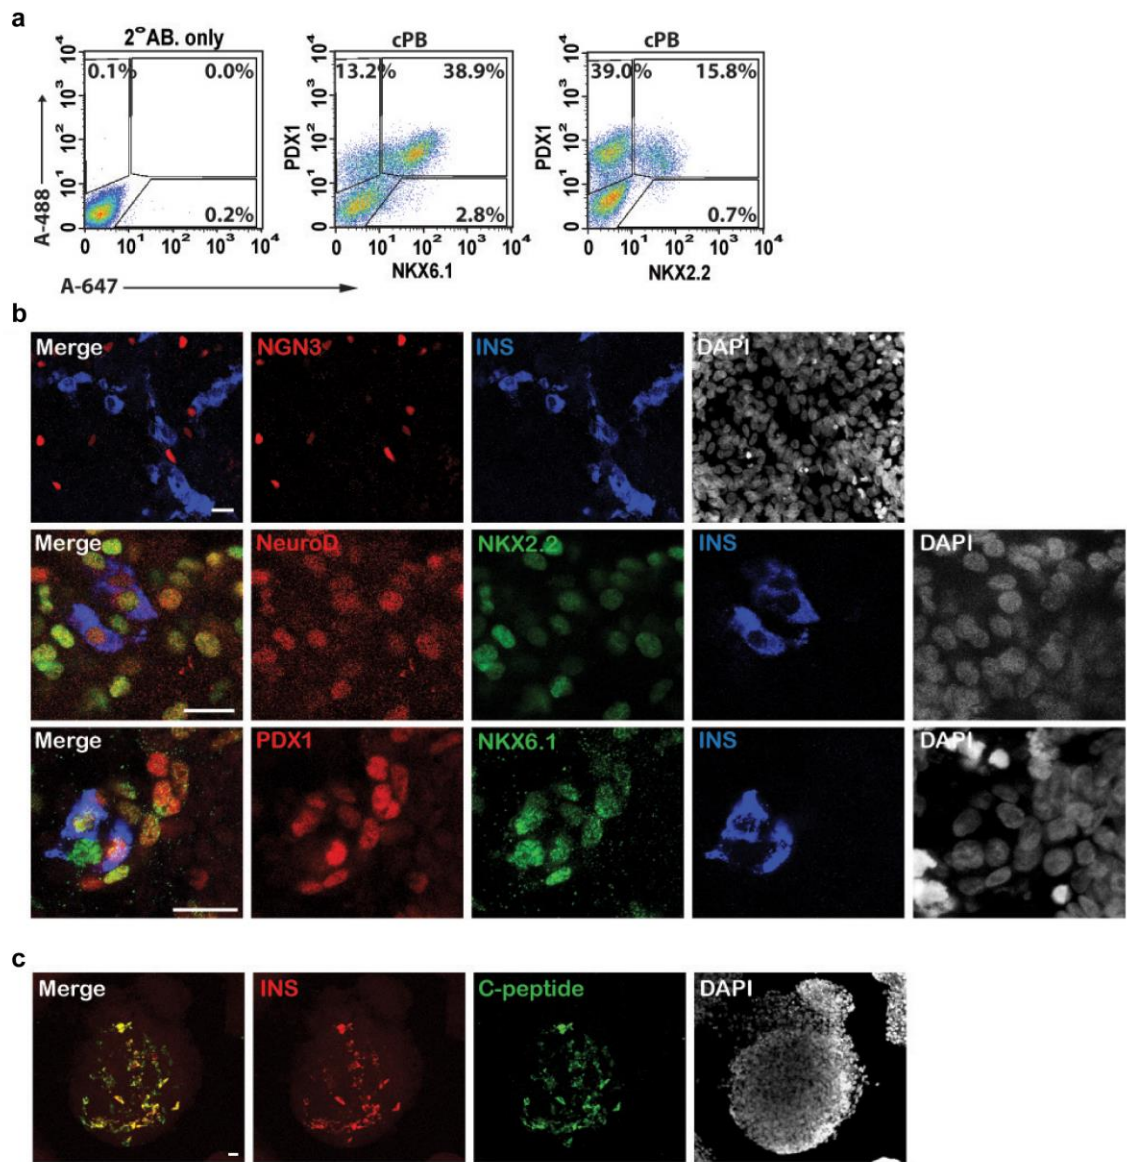

**Supplementary Figure 8. Additional characterization of cPB cells.** (a) Flow cytometric analysis of PDX1, NKX6.1, and NKX2.2 expression in cPB cells. (b) High magnification micrographs of cPB cells. Many of the Insulin (INS) positive cells co-express key beta cell transcription factors PDX1, NKX6.1, NKX2.2, and NEUROD1, but only rarely co-express endocrine progenitor marker NGN3. Scale bar, 20  $\mu$ m. (c) Co-localization of Insulin (INS) and C-peptide staining, excluding Insulin uptake from the media. Scale bar, 20  $\mu$ m.



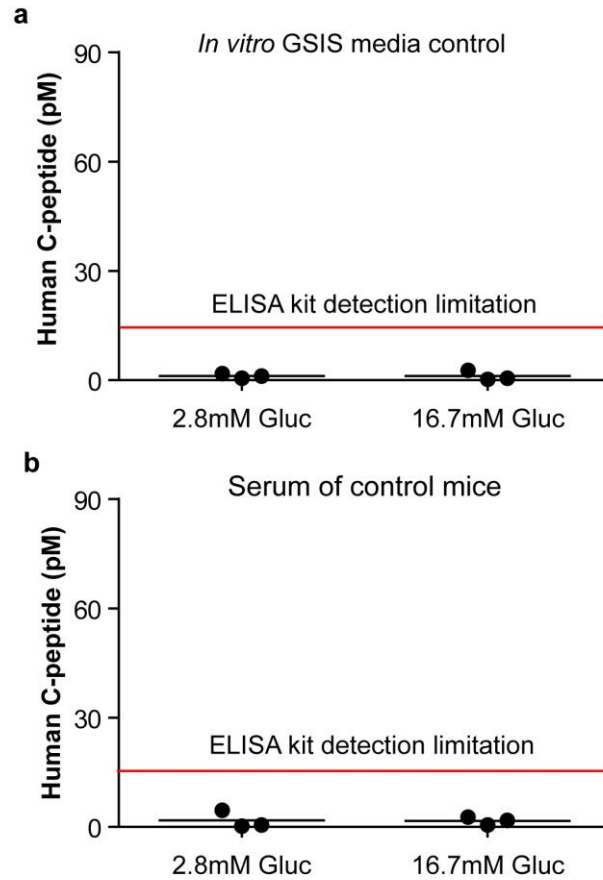

**Supplementary Figure 9. Additional characterization of cPB cells. (a+b)** ELISA analysis of human C-peptide levels in media employed for *in vitro* GSIS experiment **(a)** and serum from control NSG mice after fast and glucose challenge **(b)**. Note that all data points analyzed were below the detection limit of the assay, indicated by a red line.

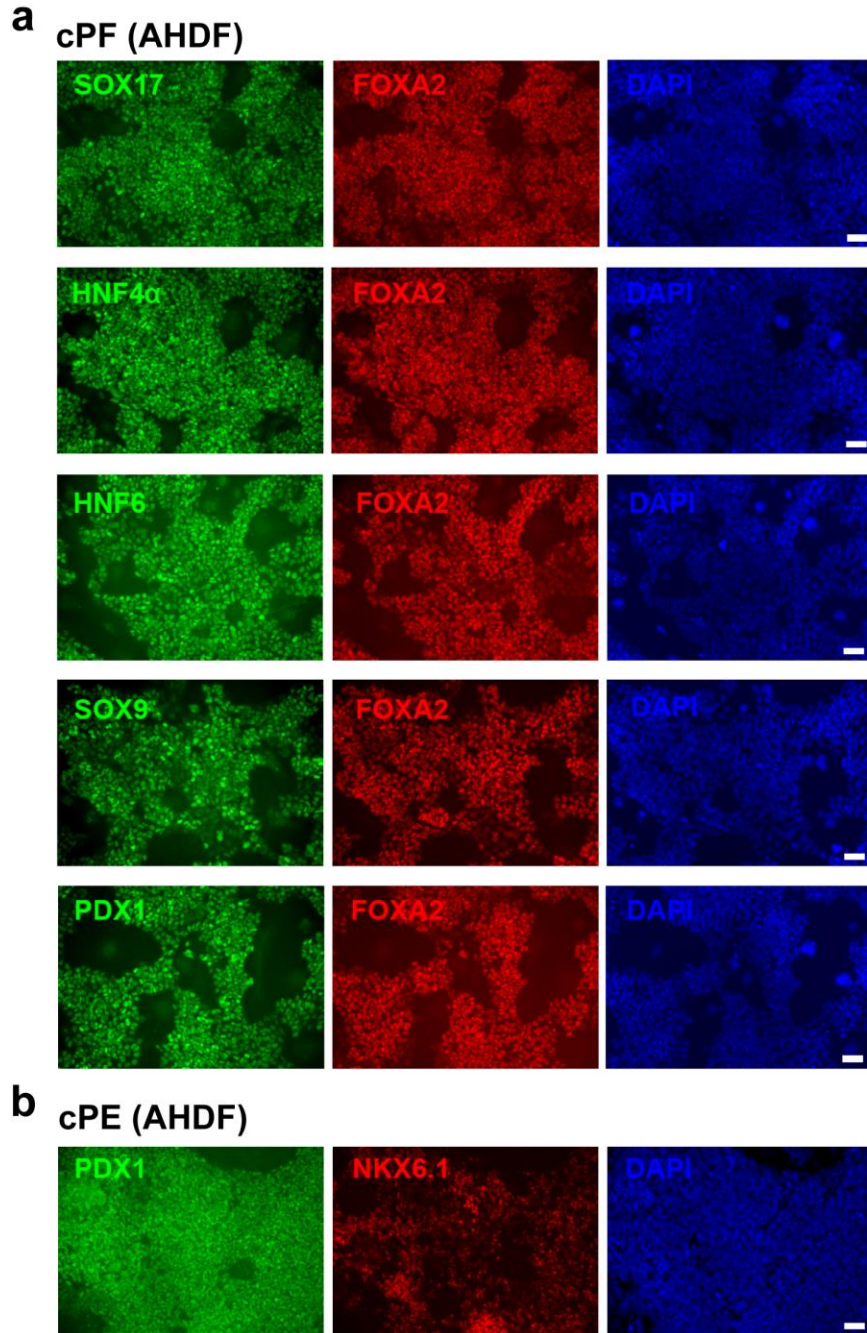

**Supplementary Figure 10. Generation of pancreatic beta-like cells from human adult fibroblasts. (a)** Characterization of cPF cells from human adult fibroblasts by immunofluorescence analysis for SOX17, FOXA2, HNF4A, HNF6, SOX9 and PDX1. Nuclei are visualized by DAPI staining. Scale bar, 50  $\mu$ m. **(b)** Characterization of cPE cells from human adult fibroblasts by immunostaining of PDX1 and NKX6.1. Nuclei are visualized by DAPI staining. Scale bar, 50  $\mu$ m.

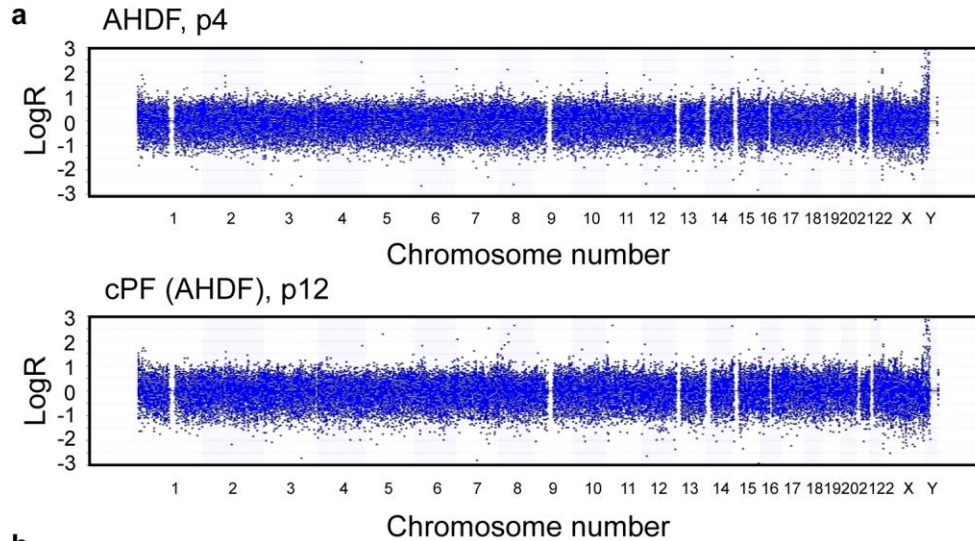

**b**

| Sample          | CNV | Location                   | Type | Annotations            |
|-----------------|-----|----------------------------|------|------------------------|
| AHDF, p4        | 6   | Chr2: 89141608-89301214    | Amp  | N/A                    |
|                 |     | Chr8: 39258894-39381514    | Amp  | ADAM5P, ADAM3A         |
|                 |     | Chr12: 9637323-9693948     | Amp  | N/A                    |
|                 |     | Chr14: 106405703-106513022 | Amp  | ADAM6                  |
|                 |     | Chr14: 106636701-106957950 | Amp  | NCRNA00226, NCRNA00221 |
|                 |     | Chr22: 23056562-23228483   | Amp  | MIR650                 |
| cPF (AHDF), p12 | 7   | Chr2: 89141608-89301214    | Amp  | N/A                    |
|                 |     | Chr8: 39258894-39381514    | Amp  | ADAM5P, ADAM3A         |
|                 |     | Chr12: 9637323-9693948     | Amp  | N/A                    |
|                 |     | Chr14: 41616413-41657239   | Del  | N/A                    |
|                 |     | Chr14: 106405703-106513022 | Amp  | ADAM6                  |
|                 |     | Chr14: 106636701-106957950 | Amp  | NCRNA00226, NCRNA00221 |
|                 |     | Chr22: 23056562-23228483   | Amp  | MIR650                 |

**Supplementary Figure 11. Additional characterization of converted posterior foregut cells (cPF) converted from human adult fibroblasts. (a+b)** Comparative genomic hybridization (CGH) array analysis of parental adult fibroblasts (AHDF) and established cPF cells (AHDF) at p12. **(a)** No gross chromosomal aberrations were detected in p12 cPF cells (AHDF) compared to parental cells. **(b)** Copy number variation analysis revealed a total of 6 and 7 CNVs in adult fibroblasts and expanded cPF cells (AHDF), respectively. One new CNV in expanded cPF cells is highlighted in blue.



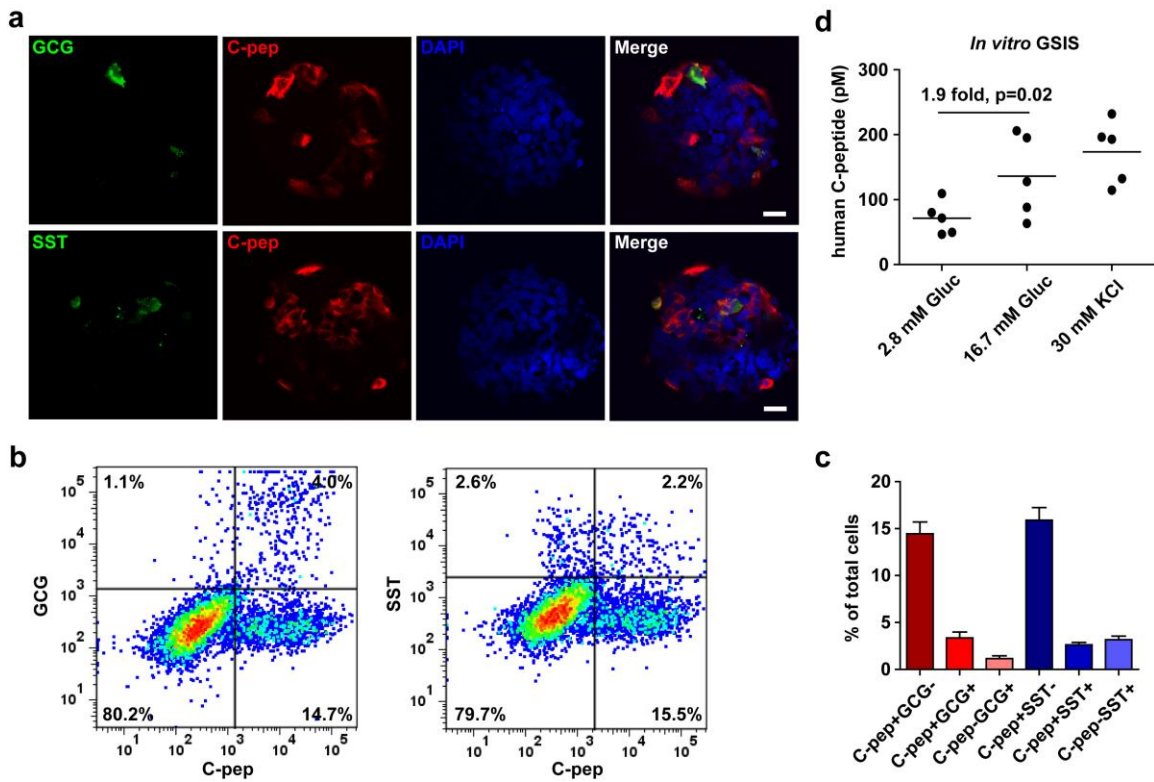

**Supplementary Figure 12. Additional characterization of functional pancreatic beta-like cells (cPB) from human adult fibroblasts.** (a) Immunofluorescence analysis of cPB cells (ADHF) for C-peptide (C-pep), Glucagon (GCG) and Somatostatin (SST). Scale bar, 20  $\mu$ m. (b+c) Flow cytometric analysis of cPB cells (ADHF) for human C-peptide (C-pep), Glucagon (GCG) and Somatostatin (SST). (b) Representative blots for co-staining of human C-pep and GCG or SST are shown. (c) Quantification of flow based analysis of the percentage of single and double positive cells for C-pep and GCG or SST. n=3 experiments. (d) *In vitro* glucose stimulated insulin secretion (GSIS) assays (n=7 cell cultures of 4 experiments) demonstrated that cPB cells (ADHF) release insulin in response to physiological levels of glucose. Depolarization by higher KCl concentration further increased insulin secretion. Note that insulin release was measured by human specific C-peptide ELISA assay. P-value was calculated using a two-tailed student's t-test.

**Supplementary Table 1. Antibodies used**

| <b>Antigen</b> | <b>Antibody species</b> | <b>Source</b>                           | <b>Dilution</b> |
|----------------|-------------------------|-----------------------------------------|-----------------|
| SOX17          | Goat                    | R&D Systems                             | 1:1000          |
| FOXA2          | Goat                    | R&D Systems                             | 1:1000          |
| FOXA2          | Rabbit                  | Millipore                               | 1:500           |
| HNF4 $\alpha$  | Mouse                   | Perseus Proteomics                      | 1:500           |
| HNF6           | Rabbit                  | Santa Cruz                              | 1:500           |
| PDX1           | Goat                    | R&D Systems                             | 1:1000          |
| NKX6.1         | Mouse                   | Developmental Studies<br>Hybridoma Bank | 1:100           |
| SOX9           | Rabbit                  | Santa Cruz                              | 1:500           |
| C-peptide      | Rabbit                  | Abcam                                   | 1:200           |
| NANOG          | Rabbit                  | Abcam                                   | 1:500           |
| TRA-1-60       | Mouse                   | BioLegend                               | 1:100           |
| NKX2.2         | Mouse                   | Developmental Studies<br>Hybridoma Bank | 1:20            |
| NGN3           | Sheep                   | R&D Systems                             | 1:200           |
| NEUROD         | Goat                    | Santa Cruz                              | 1:200           |
| Insulin (INS)  | Guinea pig              | Dako                                    | 1:500           |
| Glucagon (GCG) | Rabbit                  | Santa Cruz                              | 1:500           |
| Glucagon(GCG)  | Mouse                   | Sigma                                   | 1:1000          |
| E-cadherin     | Mouse                   | BD Bioscience                           | 1:200           |
| Beta-catenin   | Mouse                   | BD Bioscience                           | 1:200           |
| HuNu           | Mouse                   | Millipore                               | 1:500           |
| Pan-keratin    | Rabbit                  | Abcam                                   | 1:50            |
| HNF4 $\alpha$  | Rabbit                  | Santa Cruz                              | 1:300           |

|                    |        |                                 |       |
|--------------------|--------|---------------------------------|-------|
| C-peptide          | Mouse  | Millipore                       | 1:200 |
| Somatostatin (SST) | Rabbit | Dako                            | 1:300 |
| CK19               | Mouse  | Thermo Scientific Lab<br>Vision | 1:500 |
| Albumin (ALB)      | Goat   | Bethyl Laboratories             | 1:500 |



**Supplementary Table 2. Primer sequences**

| <b>Genes</b>  | <b>Forward primer</b>         | <b>Reverse primer</b>         |
|---------------|-------------------------------|-------------------------------|
| <i>SOX17</i>  | GGCGCAGCAGAATCCAGA            | CCACGACTTGCCCAGCAT            |
| <i>FOXA2</i>  | GGGAGCGGTGAAGATGGA            | TCATGTTGCTCACGGAGGAGTA        |
| <i>HNF1A</i>  | AACACCTCAACAAGGGCACT<br>C     | CCCCACTTGAAACGGTTCCT          |
| <i>HNF1B</i>  | CCAAGCCGGTCTTCCATACTC         | TGGGAGGTGTGTCATAGTCGT         |
| <i>HNF4A</i>  | CTACATCAACGACCGCCAGT          | ATCTGCTCGATCATCTGCCAG         |
| <i>HNF6</i>   | ATGTCCAGCGTCGAACTCTAC         | TGCTTTGGTACAAGTGCTTGAT        |
| <i>PDX1</i>   | CCTTTCCCATGGATGAAGTC          | CGAACTCCTTCTCCAGCTCTA         |
| <i>NKX6.1</i> | TCAACAGCTGCGTGATTTTC          | CCAAGAAGAAGCAGGACTCG          |
| <i>NKX2.2</i> | ATGTAAACGTTCTGACAACT          | TTCCATATTTGAGAAATGTTTGC       |
| <i>PTF1A</i>  | CATAGAGAACGAACCACCCTT<br>TGAG | GCACGGAGTTTCCTGGACAGA<br>GTTC |
| <i>HLXB9</i>  | TCCACCGCGGGCATGATCCT          | GCGCTTGGGCCGCGACAGCTA         |
| <i>NGN3</i>   | CCCTCTACTCCCCAGTCTCC          | CCTTACCCTTAGCACCCACA          |
| <i>INS</i>    | GCAGCCTTTGTGAACCAACA<br>C     | CCCCGCACACTAGGTAGAGA          |
| <i>NEUROD</i> | ATGACCAAATCGTACAGCGAG         | GTTTCATGGCTTCGAGGTCGT         |
| <i>PAX6</i>   | TGGGCAGGTATTACGAGACTG         | ACTCCCGCTTATACTGGGCTA         |
| <i>RFX6</i>   | ATCAGCAGCATTTCGTTCACTG<br>C   | GGAAGAAGGAATTGGGGTTTG<br>C    |
| <i>MAFA</i>   | AGCGAGAAGTGCCAACTCC           | TTGTACAGGTCCCGCTCTTT          |
| <i>GCK</i>    | GCAGATGCTGGACGACAG            | TCCTGCAGCTGGA ACTCTG          |
| <i>PCSK1</i>  | TGATCCCACAAACGAGAACA          | TCTGATTATTTGCTTGCATGG         |
| <i>KIR6.2</i> | TGTGTCACCAGCATCCACTC          | CACTTGGACCTCAATGGAGAA         |
| <i>SUR1</i>   | AGACCCTCATGAACCGACAG          | GGCTCTGTGGCTTTTCTCTC          |
| <i>UCN3</i>   | AGGCCTCCCCACAAGTTCTA<br>C     | TTCTCTTTGCCCTCCTCCTCT         |

|                   |                            |                        |
|-------------------|----------------------------|------------------------|
| <i>SLC30A8</i>    | GAGCGCCTGCTGTATCCTGAT<br>T | ATGCACAAAAGCAGCTCTGACG |
| <i>THY1</i>       | ATCGCTCTCCTGCTAACAGTC      | CTCGTACTGGATGGGTGAACT  |
| <i>COL1A1</i>     | TCACCCACCGACCAAGAAAC       | ACGGAAATTCCTCCGGTTGAT  |
| <i>endoOCT4</i>   | AGTTTGTGCCAGGGTTTTTG       | ACTTCACCTTCCCTCCAACC   |
| <i>endoNANOG</i>  | TTTGGAAGCTGCTGGGGAAG       | GATGGGAGGAGGGGAGAGGA   |
| <i>SOX1</i>       | CAGTACAGCCCCATCTCCAAC      | GCGGGCAAGTACATGCTGA    |
| <i>BYACHYUARY</i> | AATTGGTCCAGCCTTGGAAT       | CGTTGCTCACAGACCACA     |
| <i>GAPDH</i>      | TGCACCACCAACTGCTTAGC       | GGCATGGACTGTGGTCATGAG  |
